# Supplementary material for: Mutual protection against UV aging of EVA composites using highly active optical conversion additives
Source: Royal Society of Chemistry journal article supplement (doi:10.1039/c4ra03748k), 2014-01-01
Supplement: c4ra03748k1.pdf [file c4ra03748k1.pdf]

RSC Advances

ARTICLE TYPE

---

## Mutual Protection UV Aging of EVA Composites Using Highly Active Optical Conversion Additives

Jing Tao,<sup>a</sup> Yaru Ni,<sup>\*ab</sup> Chunhua Lu,<sup>\*a</sup> Jie Chen,<sup>a</sup> Yaqiong Yuan,<sup>a</sup> Jiamei Chen,<sup>a</sup> Zhongzi Xu,<sup>a</sup>

Received (in XXX, XXX) Xth XXXXXXXXX 20XX, Accepted Xth XXXXXXXXX 20XX

DOI: 10.1039/b000000x

<sup>a</sup> State Key Laboratory of Materials-Orient Chemical Engineering, College of Materials Science and Engineering, Nanjing Technology University, Nanjing, 210009, People's Republic of China. Fax: +86 25 83587220; Tel.: +86 25 83587252; E-mail: nyr@njtech.edu.cn (Y. Ni), chhlu@njtech.edu.cn (C. Lu), waitflying@126.com (J. Tao)

<sup>b</sup> Key Laboratory of MEMS of Ministry of Education, Southeast University, Nanjing 210096, China

†Electronic Supplementary Information (ESI) available. See DOI: 10.1039/b000000x/

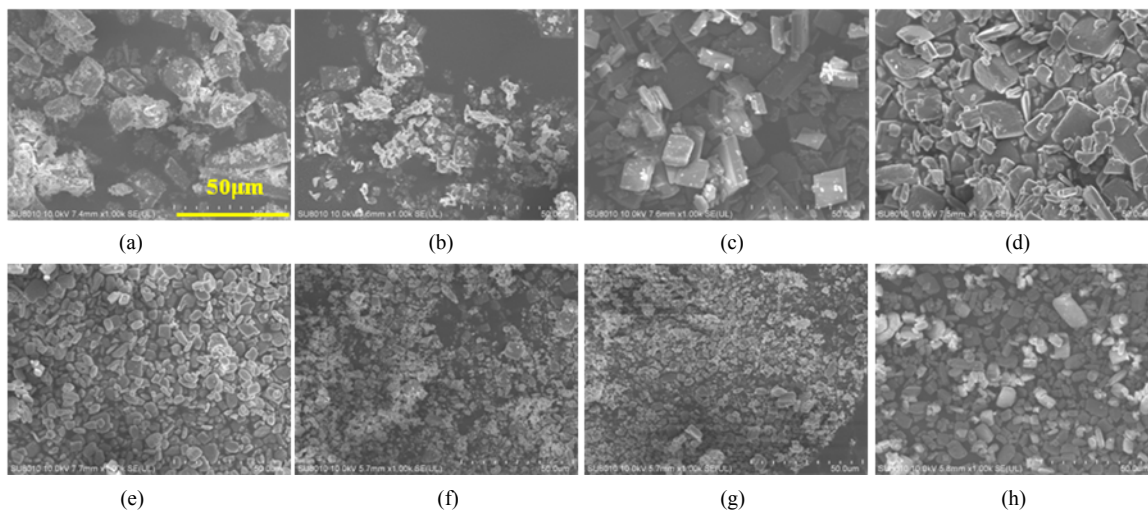

Fig. S1 FSEM of MSTP powder in different reaction time (microwave/ultrasound: 500W/500W) (a)0.17h, (b)0.5h, (c)1h, (d)2h, (e)4h, (f)6h, (g)8h, (h)10h.

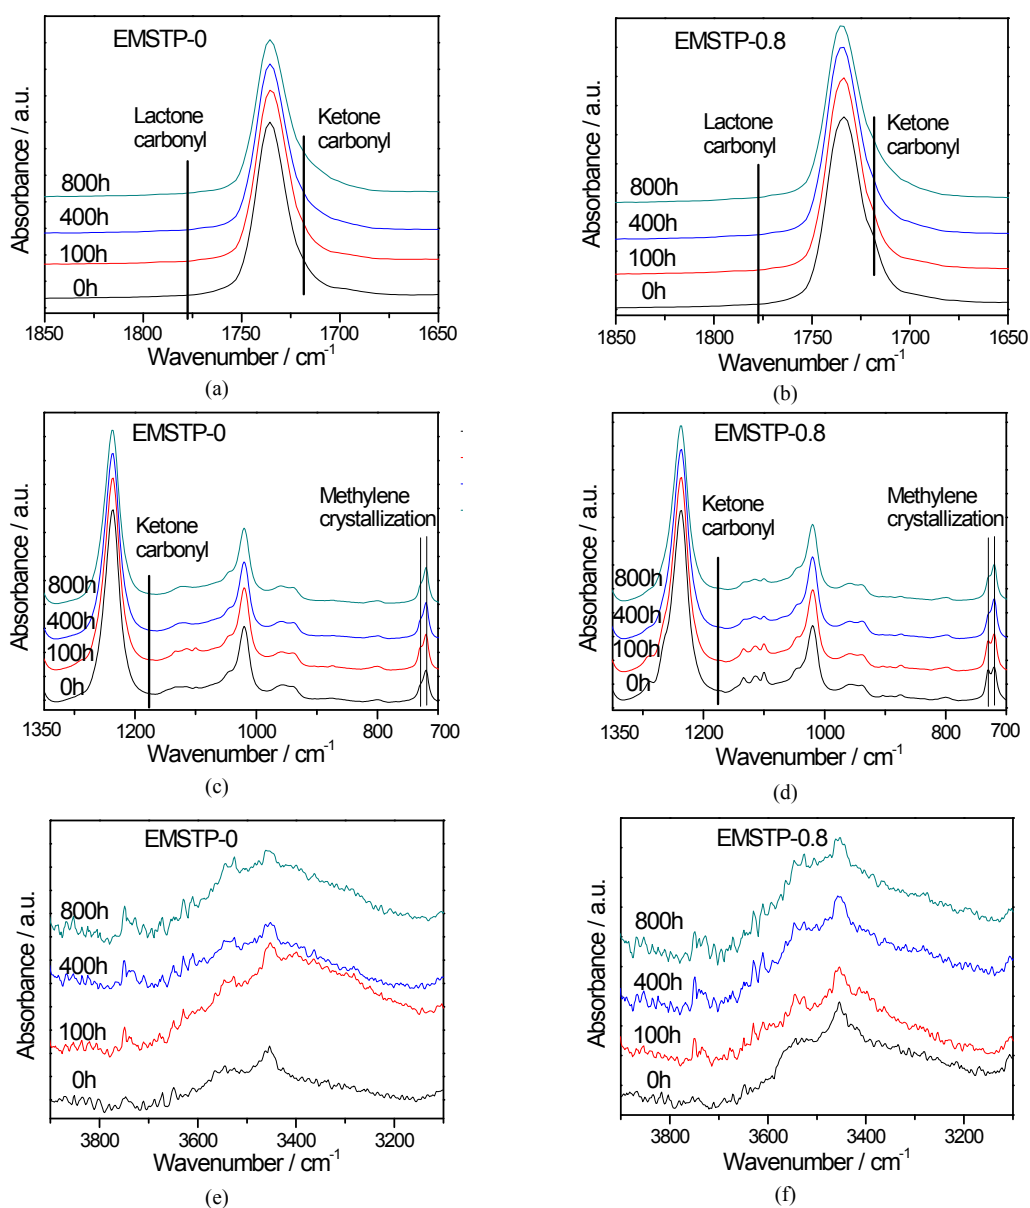

Fig. S2 ATR-FTIR spectra of pure EVA (a, c, e) and MSTP doped EVA films in 0.8 wt% concentration (b, d, f) irradiation for various time in the regions 1850-1650  $\text{cm}^{-1}$  (a, b), 1350-1100  $\text{cm}^{-1}$  (c, d), 3900-3100  $\text{cm}^{-1}$  (e, f).
